# Supplementary material for: Growth and theoretical study on the deep-ultraviolet transparent β-CsBa2(PO3)5 nonlinear optical crystal
Source: Royal Society of Chemistry journal article supplement (doi:10.1039/c9ce00636b), 2019-01-01
Supplement: c9ce00636b1.pdf [file c9ce00636b1.pdf]

Electronic Supplementary Information

for

**Growth and theoretical study on the deep-ultraviolet transparent  
 $\beta$ -CsBa<sub>2</sub>(PO<sub>3</sub>)<sub>5</sub> nonlinear optical crystal**

Yang Zhong,<sup>a</sup> Pai Shan,<sup>†a</sup> Tongqing Sun,<sup>\*abd</sup> Zhenpeng Hu,<sup>a</sup> Hongde Liu,<sup>abd</sup>  
Shiguo Liu,<sup>abd</sup> Yongfa Kong<sup>abcd</sup> and Jingjun Xu<sup>abcd</sup>

<sup>a</sup> School of Physics, Nankai University, Tianjin 300071, P. R. China.

<sup>b</sup> The MOE Key Laboratory of Weak-Light Nonlinear Photonics, Nankai University,  
Tianjin 300457, P. R. China.

<sup>c</sup> TEDA institute of Applied Physics, Nankai University, Tianjin 300457, P. R. China.

<sup>d</sup> Collaborative Innovation Center of Extreme Optics, Shanxi University, Taiyuan  
030006, P. R. China.

<sup>†</sup> The present affiliation is Fujian Institute of Research on the Structure of Matter,  
Chinese Academy of Sciences, Fuzhou, Fujian 350002, P. R. China.

1. Details of Characterization Experiments
2. Single X-ray Diffraction Information and Data Tables

## 1. Details of Characterization Experiments

Powder X-ray diffraction (PXRD) was carried out at room temperature on a Bruker D8 Advance diffractometer using graphite monochromatized Cu K $\alpha$  radiation. The PXRD data were collected in the  $2\theta$  range of 10–60°.

Infrared (IR) spectrum was recorded on a Nicolet Magna-IR 560 ESP Fourier transform IR (FTIR) spectrometer. A KBr pressed plate was employed for record.

Raman spectrum was measured on a Renishaw inVia Raman microscope. The wavelength of the excited CW argon laser was 514 nm.

High-temperature in-situ XRD analysis of  $\beta$ -CBPO polycrystalline sample were performed on the Bruker D8 advance diffractometer in a vacuum accessory in the range of 500°C–900°C. The PXRD patterns were recorded at  $2\theta = 10\text{--}60^\circ$  with a delay time of 600 s before each pattern recording. The step size was 0.0205°, and the step time was 0.24 s during the whole analysis. After that, the sample was cooled to room temperature, and the PXRD pattern was recorded again.

## 2. Single X-ray Diffraction Information and Data Tables

Single crystal X-ray diffraction data for  $\beta$ -CsBa<sub>2</sub>(PO<sub>3</sub>)<sub>5</sub> crystal was collected on an Agilent Gemini E diffractometer equipped with an Eos CCD detector and an Cryojet XL liquid nitrogen cryogenic system. Mo K $\alpha$  confocal monochromated radiation ( $\lambda = 0.71073$  Å) was used. Intensity data were corrected for Lorentz, polarization, and background effects using the Agilent program CrysAlisPro, and a semi-empirical correction for adsorption was applied. SHELXS-97 and SHELXL-97 programs were used for the solution and refinement of the crystal structure, respectively. All non-hydrogen atoms were refined anisotropically.

Crystal data, data collection, and refinement parameters are summarized in Table S1. The fractional atomic coordinates and the equivalent isotropic displacement parameters are listed in Table S2. The anisotropic displacement parameters are given in Table S3.

**Table S1.** Crystal data, data collection, and refinement parameters for  $\beta$ -CsBa<sub>2</sub>(PO<sub>3</sub>)<sub>5</sub>.

|                                                              |                                                                 |
|--------------------------------------------------------------|-----------------------------------------------------------------|
| Empirical formula                                            | CsBa <sub>2</sub> (PO <sub>3</sub> ) <sub>5</sub>               |
| Formula weight                                               | 802.44                                                          |
| Temperature / K                                              | 103.8                                                           |
| Crystal system                                               | monoclinic                                                      |
| Space group                                                  | <i>Pn</i>                                                       |
| <i>a</i> / Å, <i>b</i> / Å, <i>c</i> / Å                     | 8.7687(3), 7.3223(3), 10.9901(5)                                |
| $\alpha$ /°, $\beta$ /°, $\gamma$ /°                         | 90.00, 90.224(3), 90.00                                         |
| Volume / Å <sup>3</sup>                                      | 705.63(5)                                                       |
| <i>Z</i>                                                     | 2                                                               |
| $\rho_{\text{calc}} / \text{mg}\cdot\text{mm}^{-3}$          | 3.777                                                           |
| $\mu / \text{mm}^{-1}$                                       | 8.735                                                           |
| <i>F</i> <sub>(000)</sub>                                    | 724                                                             |
| Crystal size / mm <sup>3</sup>                               | 0.50 × 0.18 × 0.04                                              |
| 2 $\theta$ range for data collection                         | 5.94 to 51.96°                                                  |
| Index ranges                                                 | −10 ≤ <i>h</i> ≤ 10, −9 ≤ <i>k</i> ≤ 9, −13 ≤ <i>l</i> ≤ 9      |
| Reflections collected                                        | 4994                                                            |
| Independent reflections                                      | 2187 [ <i>R</i> <sub>int</sub> = 0.0345 (inf - 0.9 Å)]          |
| Data/restraints/parameters                                   | 2187/14/209                                                     |
| Goodness-of-fit on <i>F</i> <sup>2</sup>                     | 1.054                                                           |
| Final <i>R</i> indexes [ <i>I</i> > 2 $\sigma$ ( <i>I</i> )] | <i>R</i> <sub>1</sub> = 0.0291, <i>wR</i> <sub>2</sub> = 0.0715 |
| Final <i>R</i> indexes [all data]                            | <i>R</i> <sub>1</sub> = 0.0295, <i>wR</i> <sub>2</sub> = 0.0718 |
| Largest diff. peak/hole / e·Å <sup>-3</sup>                  | 1.337/−1.083                                                    |
| Flack Parameters                                             | −0.03(2)                                                        |
| Completeness                                                 | 0.999                                                           |

**Table S2.** The fractional atomic coordinates ( $\times 10^4$ ) and the equivalent isotropic displacement parameters ( $\text{\AA}^2 \times 10^3$ ) for  $\beta$ -CsBa<sub>2</sub>(PO<sub>3</sub>)<sub>5</sub>. ( $U_{\text{eq}}$  is defined as 1/3 of the trace of the orthogonalised  $U_{ij}$  tensor.)

| Atom | $x$        | $y$       | $z$       | $U_{\text{eq}}$ |
|------|------------|-----------|-----------|-----------------|
| Cs1  | 98.6(6)    | 3590.2(8) | 3223.4(6) | 9.06(19)        |
| Ba1  | 1994.6(6)  | 1556.3(7) | 7058.6(5) | 7.18(17)        |
| Ba2  | -2930.6(7) | 1294.4(6) | 6172.2(6) | 6.94(17)        |
| P1   | -1223(3)   | -3493(3)  | 6109(3)   | 7.6(6)          |
| P2   | 246(3)     | -1139(3)  | 4351(2)   | 6.7(5)          |
| P3   | 3664(3)    | -1545(3)  | 4466(3)   | 6.7(6)          |
| P4   | 3879(3)    | -5515(3)  | 5128(2)   | 7.1(5)          |
| P5   | 5946(3)    | -6558(3)  | 3132(3)   | 7.4(5)          |
| O1   | -2502(7)   | -2300(9)  | 6498(6)   | 9.5(15)         |
| O2   | -1388(8)   | -5505(9)  | 6086(6)   | 13.5(15)        |
| O3   | 304(7)     | -2879(9)  | 6806(6)   | 7.8(13)         |
| O4   | -762(7)    | -2858(8)  | 4751(6)   | 8.3(13)         |
| O5   | 72(7)      | 385(8)    | 5243(6)   | 8.2(14)         |
| O6   | -109(7)    | -751(9)   | 3045(6)   | 8.7(14)         |
| O7   | 1877(7)    | -2034(9)  | 4421(7)   | 15.0(16)        |
| O8   | 3968(7)    | -84(9)    | 5365(6)   | 11.6(14)        |
| O9   | 4203(8)    | -1374(8)  | 3183(7)   | 10.0(15)        |
| O10  | 4309(9)    | -3399(8)  | 5054(7)   | 7.3(16)         |
| O11  | 2233(7)    | -5848(9)  | 5252(6)   | 8.3(14)         |
| O12  | 4903(9)    | -6272(8)  | 6079(7)   | 13.9(16)        |
| O13  | 4347(9)    | -6249(8)  | 3813(7)   | 11.8(16)        |
| O14  | 6813(7)    | -4824(8)  | 3093(6)   | 10.1(14)        |
| O15  | 6759(8)    | -8198(9)  | 3628(7)   | 11.2(15)        |

**Table S3.** The anisotropic displacement parameters ( $\text{\AA}^2 \times 10^3$ ) for  $\beta\text{-CsBa}_2(\text{PO}_3)_5$ .

| Atom | $U_{11}$ | $U_{22}$ | $U_{33}$ | $U_{23}$ | $U_{13}$ | $U_{12}$ |
|------|----------|----------|----------|----------|----------|----------|
| Cs1  | 10.6(4)  | 10.5(3)  | 6.0(3)   | 0.7(2)   | -1.4(3)  | 0.8(2)   |
| Ba1  | 8.6(3)   | 9.3(3)   | 3.6(3)   | -0.6(2)  | -1.0(2)  | 0.0(2)   |
| Ba2  | 8.6(3)   | 7.9(3)   | 4.3(3)   | 0.2(2)   | -0.7(2)  | 0.5(2)   |
| P1   | 9.7(14)  | 9.7(13)  | 3.5(14)  | 0.3(9)   | -1.3(11) | -0.5(9)  |
| P2   | 7.3(12)  | 9.1(11)  | 3.6(13)  | 0.4(9)   | -1.4(10) | 0.4(9)   |
| P3   | 8.7(14)  | 8.1(12)  | 3.2(14)  | 1.7(9)   | 0.6(11)  | 1.3(9)   |
| P4   | 10.2(12) | 6.8(11)  | 4.5(12)  | 0.5(10)  | 0.2(9)   | 1.5(9)   |
| P5   | 7.3(13)  | 9.9(11)  | 4.9(14)  | 0.6(9)   | -1.1(10) | 0.3(8)   |
| O1   | 6(3)     | 12(3)    | 11(4)    | 2(3)     | -2(3)    | 7(2)     |
| O2   | 15(4)    | 12(3)    | 14(4)    | 6(3)     | 1(3)     | -4(3)    |
| O3   | 6(3)     | 11(3)    | 7(4)     | 1(3)     | -2(3)    | -2(3)    |
| O4   | 11(3)    | 9(3)     | 5(3)     | 2(3)     | -3(3)    | -1(3)    |
| O5   | 10(3)    | 8(3)     | 6(4)     | -2(3)    | -6(3)    | 0(2)     |
| O6   | 12(3)    | 11(3)    | 3(3)     | -1(2)    | -5(2)    | -1(2)    |
| O7   | 7(4)     | 11(3)    | 27(5)    | 2(3)     | 1(3)     | 3(3)     |
| O8   | 16(4)    | 7(3)     | 11(4)    | -1(3)    | -3(3)    | 4(3)     |
| O9   | 11(4)    | 15(4)    | 4(4)     | -1(3)    | 1(3)     | 2(2)     |
| O10  | 6(4)     | 10(3)    | 5(4)     | 3(2)     | -4(3)    | -1(2)    |
| O11  | 8(3)     | 12(3)    | 5(3)     | 4(2)     | 0(2)     | -1(2)    |
| O12  | 17(4)    | 13(4)    | 11(4)    | -4(3)    | -2(3)    | 0(3)     |
| O13  | 18(4)    | 12(3)    | 6(4)     | -2(3)    | 4(3)     | -1(3)    |
| O14  | 12(3)    | 10(3)    | 8(4)     | -1(3)    | 0(3)     | -2(3)    |
| O15  | 9(4)     | 14(3)    | 11(4)    | 1(3)     | 0(3)     | 3(3)     |
